# Supplementary material for: Au supported defect free TS-1 for enhanced performance of gas phase propylene epoxidation with H2 and O2
Source: Royal Society of Chemistry journal article supplement (doi:10.1039/d2se00365a), 2022-01-01
Supplement: d2se00365a1.pdf [file d2se00365a1.pdf]

## Supporting Information

# **Au supported defect free TS-1 for Enhanced performance on gas phase propylene epoxidation with H<sub>2</sub> and O<sub>2</sub>**

Wenqian Li,<sup>a,b</sup> Minghuang Qiu,<sup>a</sup> Wanting Li,<sup>a,b</sup> Lixia Ge,<sup>a,b</sup> Kun Zhang<sup>\*c</sup>, Xinqing Chen<sup>\*a,b</sup>

*<sup>a</sup>CAS Key Laboratory of Low-carbon Conversion Science and Engineering, Shanghai Advanced Research Institute, Chinese Academy of Sciences, Shanghai 201210, China.*

*E-mail addresses: chenxq@sari.ac.cn*

*<sup>b</sup>University of Chinese Academy of Sciences, Beijing 100049, China.*

*<sup>c</sup>Shanghai Key Laboratory of Green Chemistry and Chemical Processes, School of Chemistry and Molecular Engineering, East China Normal University, Shanghai 200062, China. E-mail addresses: kzhang@chem.ecnu.edu.cn*

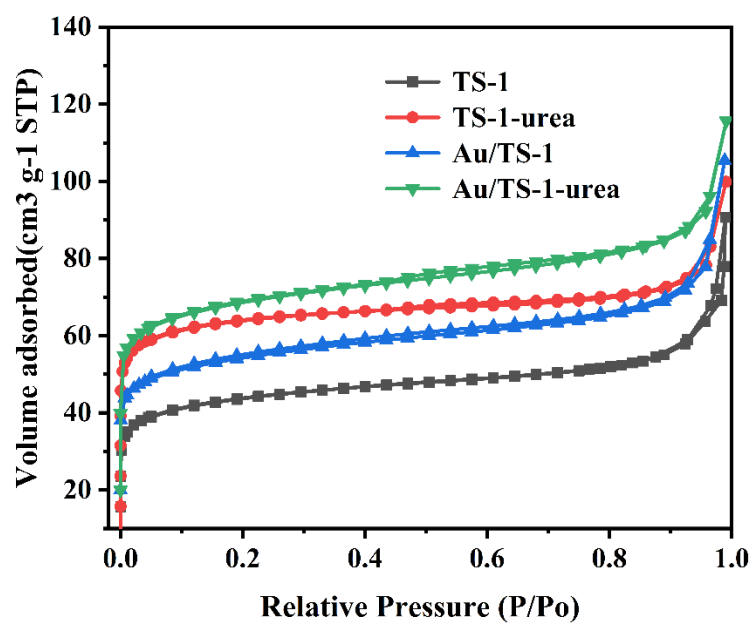

**Figure S1.** N<sub>2</sub> adsorption-desorption isotherms of TS-1, TS-1-urea, Au/ TS-1, and Au/ TS-1-urea.

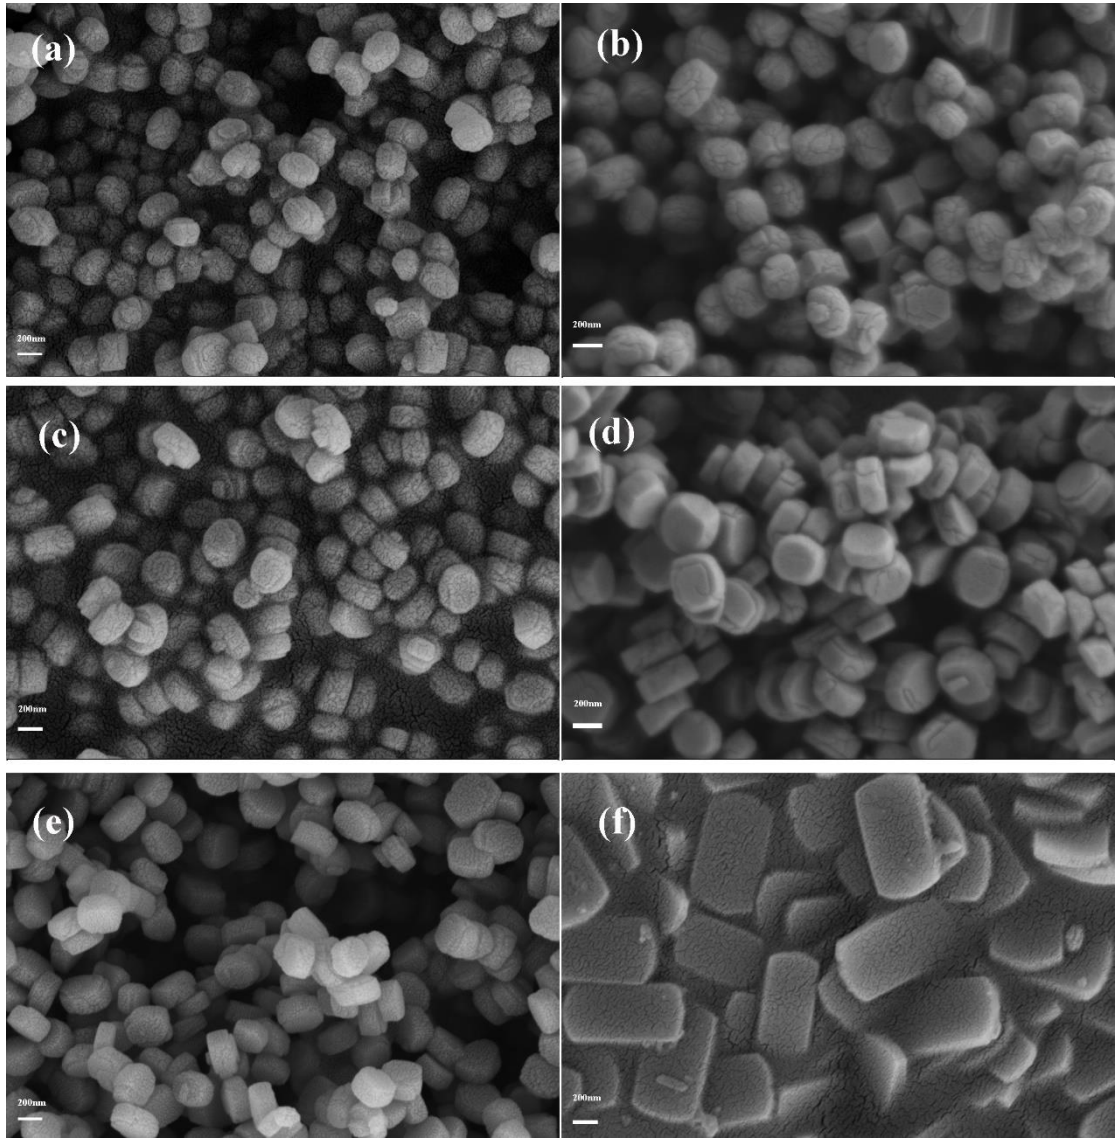

**Figure S2.** SEM images of TS-1 zeolites synthesized with different amounts of urea.

(a) TS-1, (b) TS-1-0.05urea, (c) TS-1-0.1urea, (d) TS-1-0.2urea,

(e) TS-1-0.3urea, (f) TS-1-0.4urea.

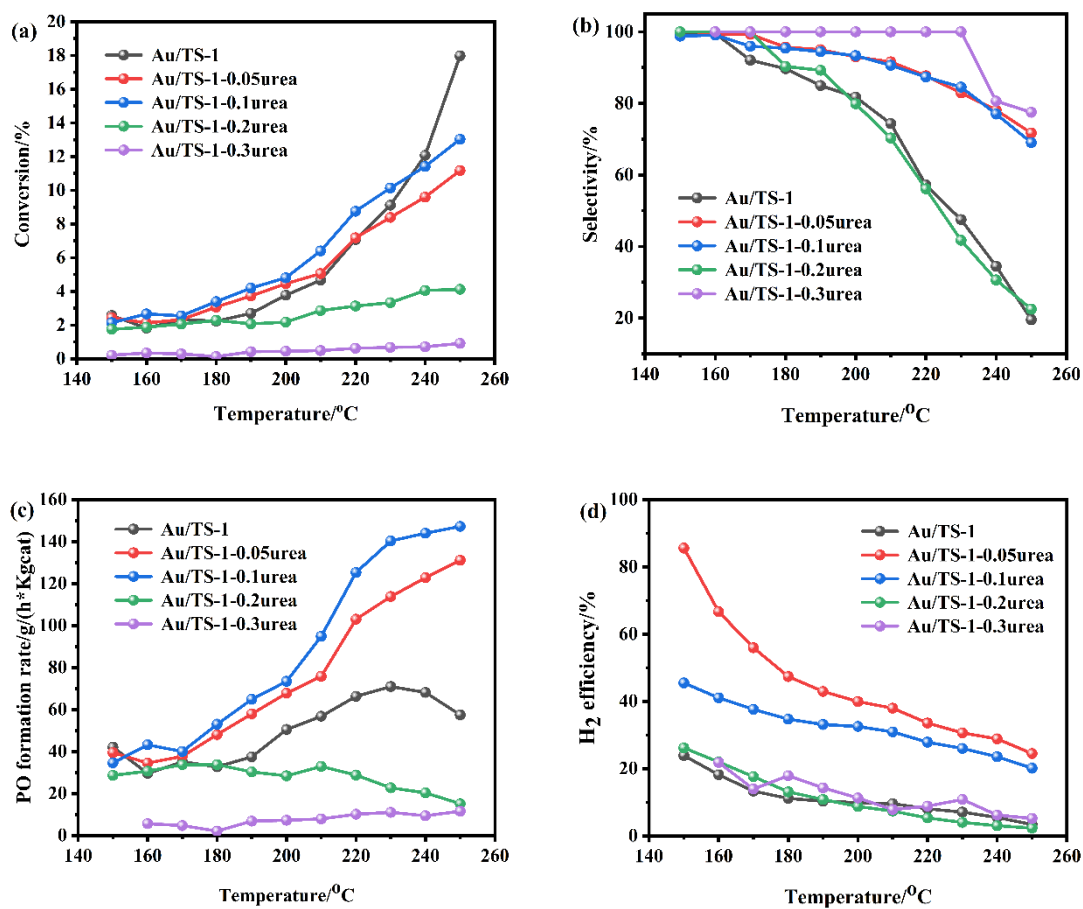

**Figure S3** Catalytic performance of zeolites synthesized with different amounts of urea.

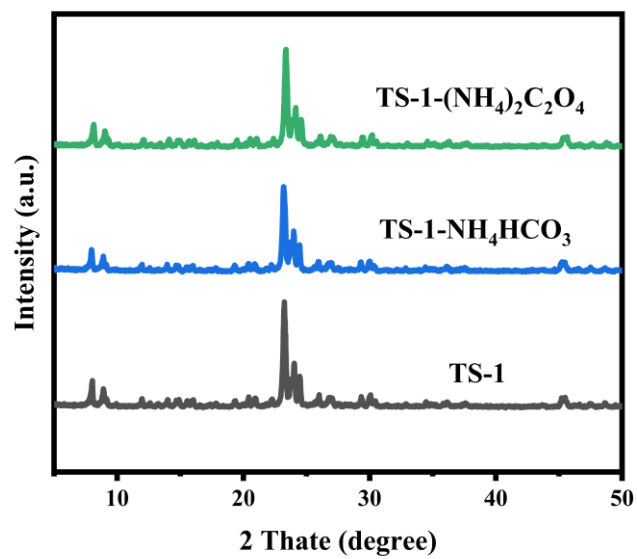

**Figure S4.** XRD patterns of TS-1, TS-1-NH<sub>4</sub>HCO<sub>3</sub>, and TS-1-(NH<sub>4</sub>)<sub>2</sub>C<sub>2</sub>O<sub>4</sub>, respectively.

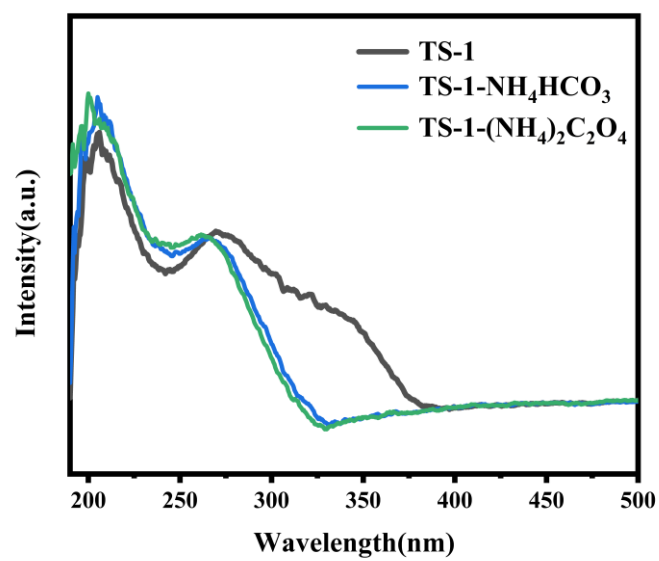

**Figure S5.** UV-vis spectra of TS-1, TS-1-NH<sub>4</sub>HCO<sub>3</sub>, and TS-1-(NH<sub>4</sub>)<sub>2</sub>C<sub>2</sub>O<sub>4</sub>, respectively.

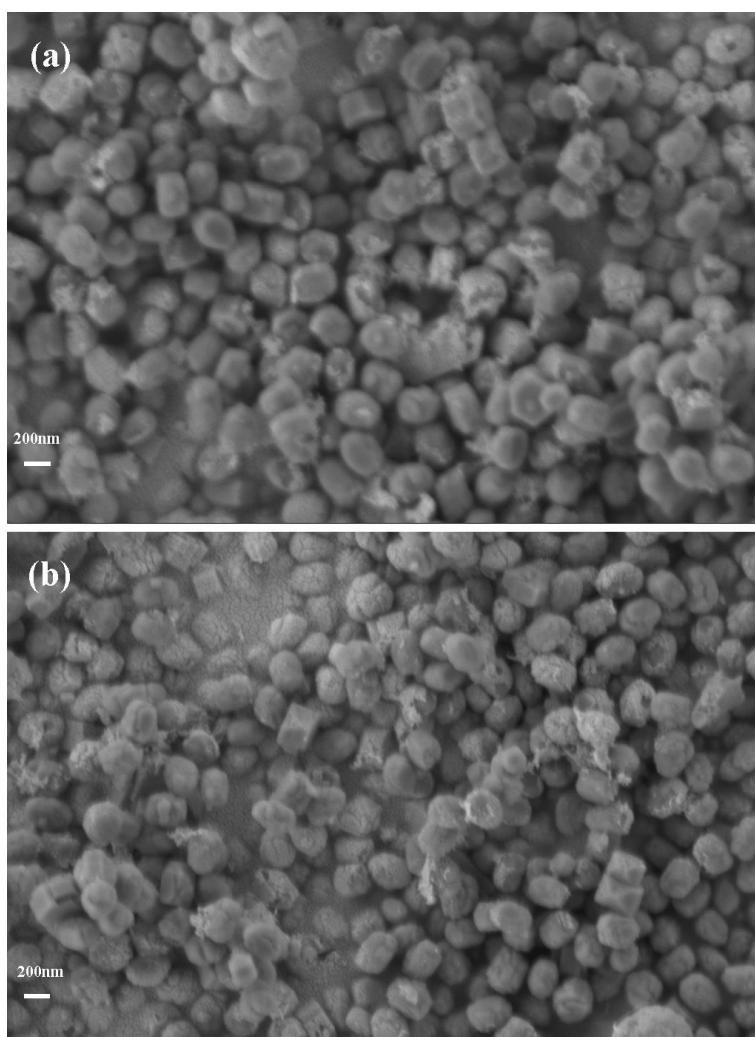

**Figure S6.** SEM images of TS-1 zeolites synthesized with different additives.

(a) TS-1- $\text{NH}_4\text{HCO}_3$ , (b) TS-1- $(\text{NH}_4)_2\text{C}_2\text{O}_4$ .

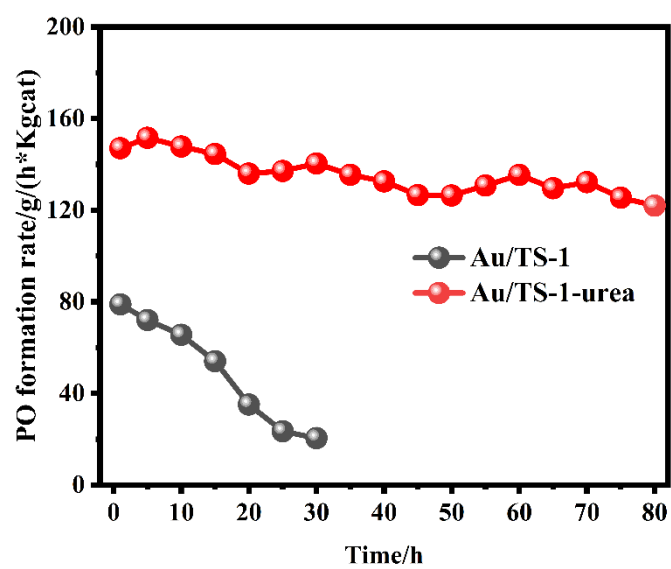

**Figure S7.** Propylene epoxidation over the Au/TS-1 and Au/TS-1-urea catalysts at different time on stream. Temperature, 230 °C.



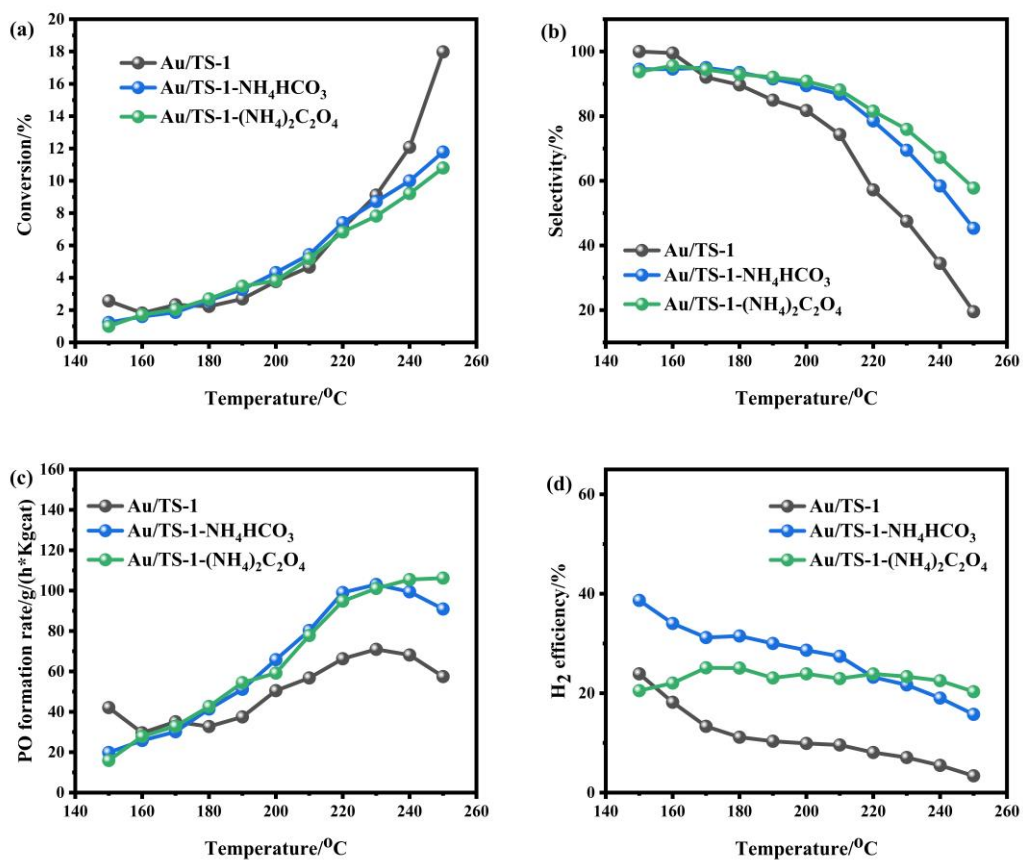

**Figure S8.** Catalytic performance of zeolites synthesized with different additives.

Table S1 Textural properties of TS-1, TS-1-urea, Au/ TS-1, and Au/ TS-1-urea.

| Samples          | $S_{\text{BET}}$<br>( $\text{m}^2/\text{g}$ ) | $S_{\text{micro}}$<br>( $\text{m}^2/\text{g}$ ) | $S_{\text{ext}}$<br>( $\text{m}^2/\text{g}$ ) | $V_{\text{T}}$ ( $\text{cm}^3/\text{g}$ ) | $V_{\text{micro}}$ ( $\text{cm}^3/\text{g}$ ) |
|------------------|-----------------------------------------------|-------------------------------------------------|-----------------------------------------------|-------------------------------------------|-----------------------------------------------|
| TS-1             | 138                                           | 89                                              | 43                                            | 0.12                                      | 0.046                                         |
| TS-1-urea        | 200                                           | 152                                             | 46                                            | 0.15                                      | 0.079                                         |
| Au/TS-1          | 171                                           | 109                                             | 62                                            | 0.16                                      | 0.056                                         |
| Au/TS-1-<br>urea | 216                                           | 145                                             | 71                                            | 0.18                                      | 0.075                                         |
